# Supplementary material for: A high-throughput screen identifies small molecule modulators of alternative splicing by targeting RNA G-quadruplexes
Source: PubMed Central journal article supplement — Nucleic Acids Res. 2019 Jan 30;47(7):3667–79. doi: 10.1093/nar/gkz036 (PMC6468248; doi:10.1093/nar/gkz036), 2019-01-30
Supplement: gkz036_supplemental_files.pdf [file gkz036_supplemental_files.pdf]

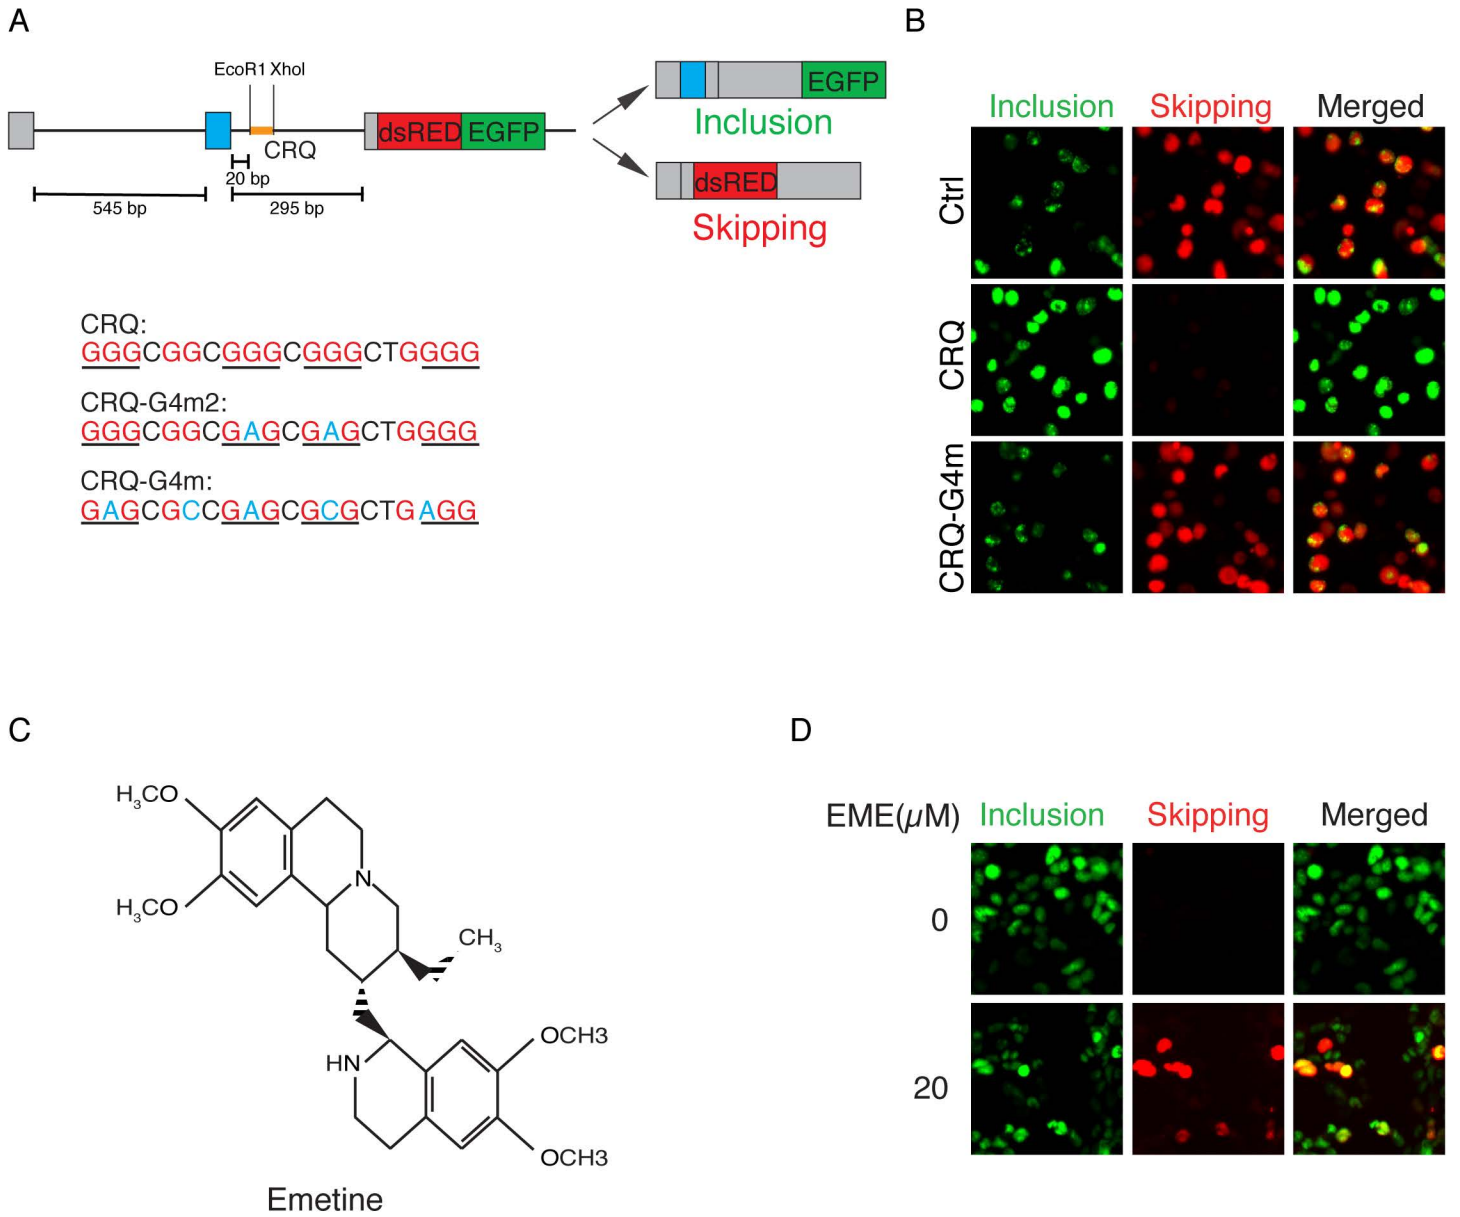

A

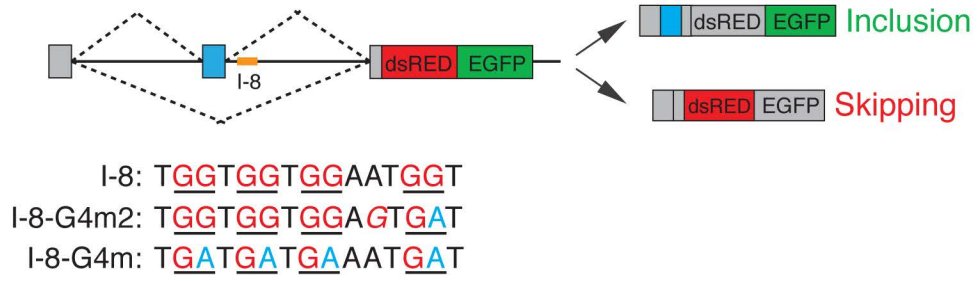

B

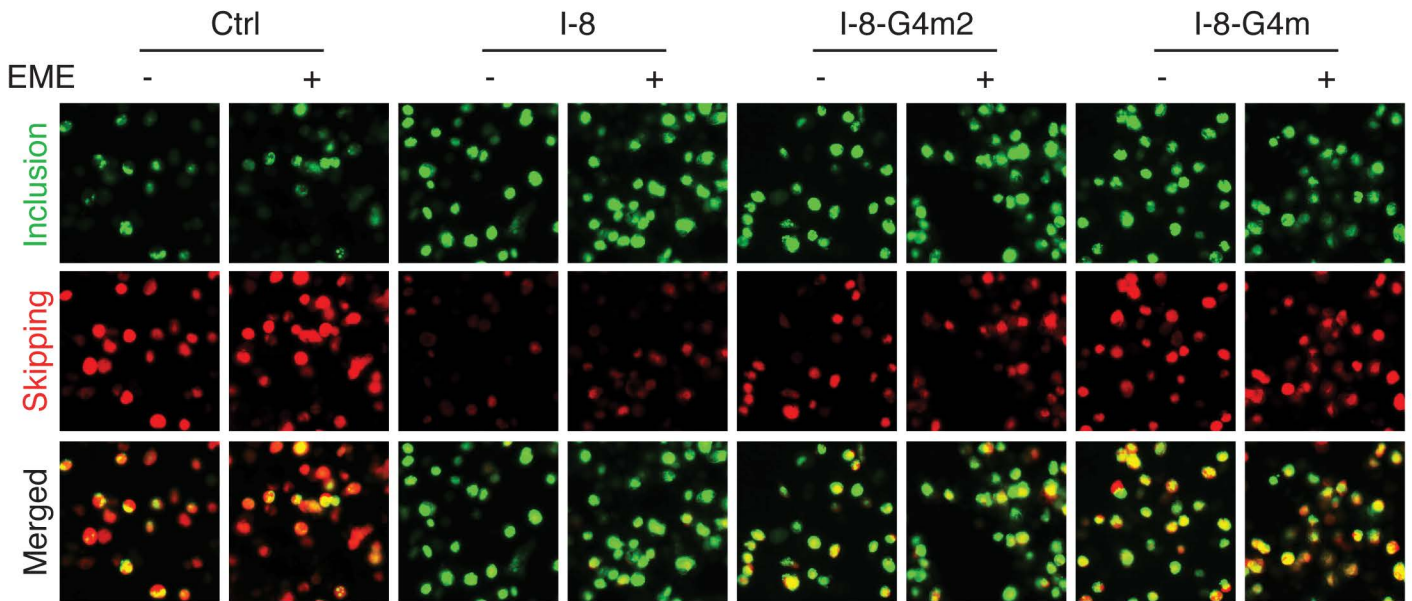

C

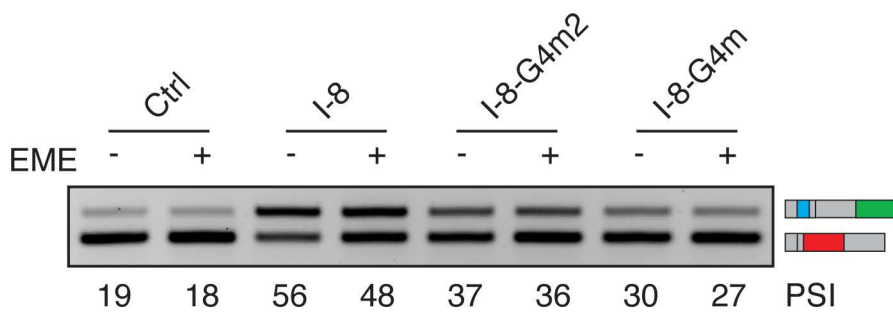

D

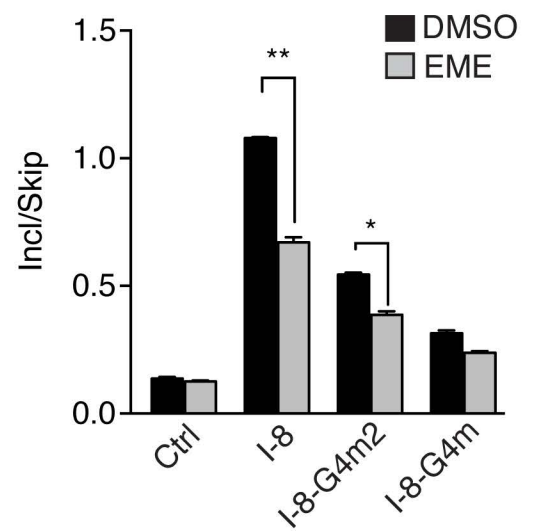

A

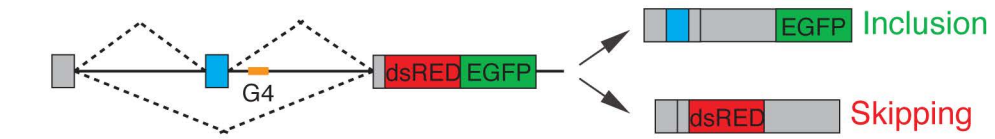

G2U1: GGUGGUGGUGG

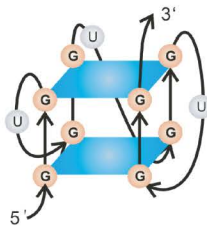

G3U1: GGGUGGGUGGGUGGG

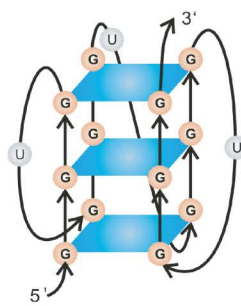

NRQ: GGGAGGGCGGGUCUGGG

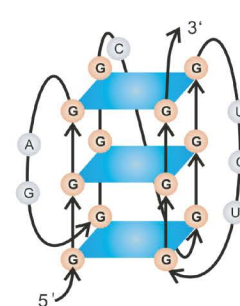

B

|                | CRQ                  |     |     | CRQ-G4m |     |     |
|----------------|----------------------|-----|-----|---------|-----|-----|
| EME ( $\mu$ M) | 0                    | 500 | 750 | 0       | 500 | 750 |
| hnRNPF         | [Western blot bands] |     |     |         |     |     |

A

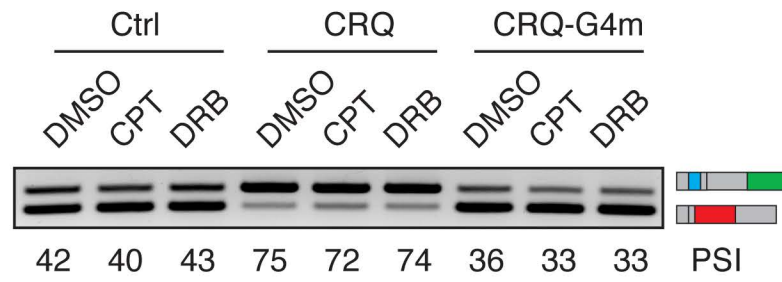

B

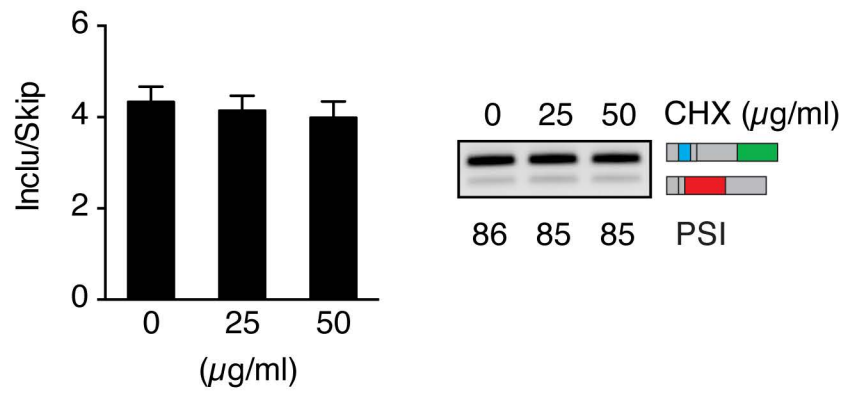

A

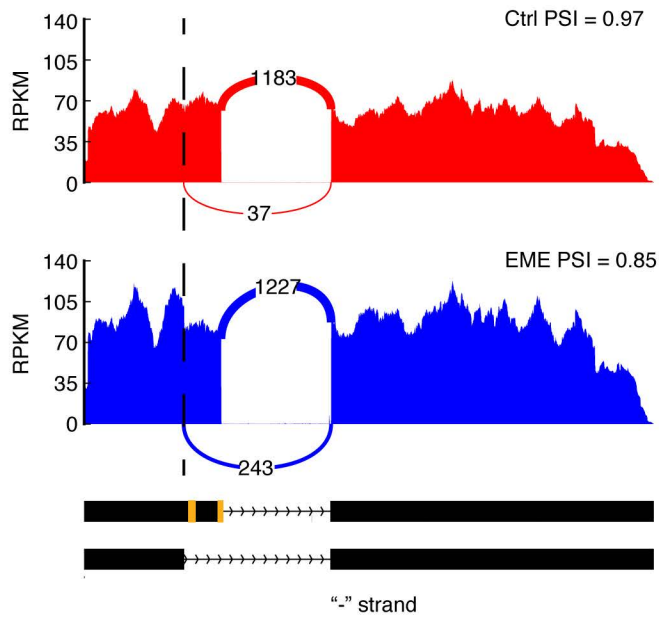

B

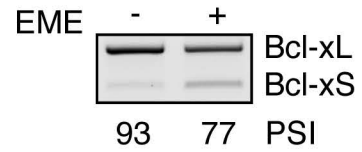

C HMLE

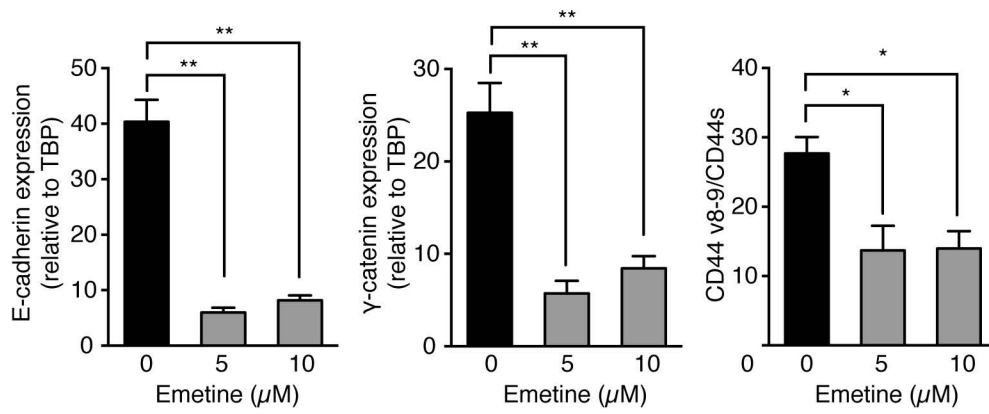

D MCF7

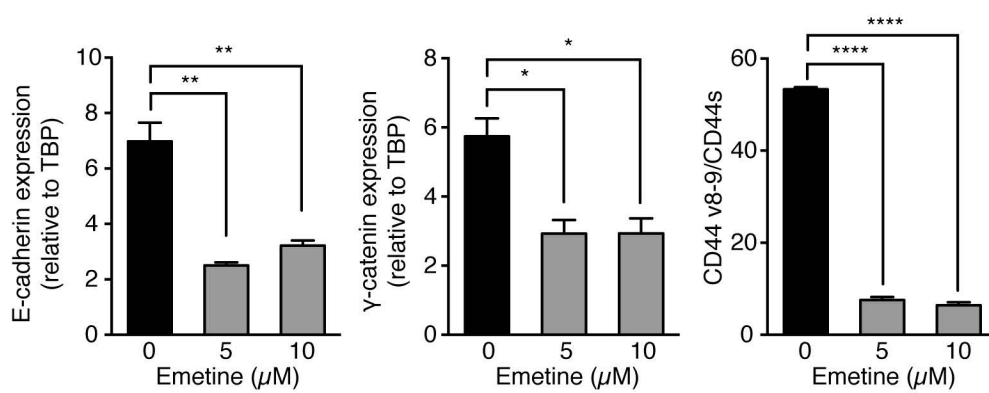

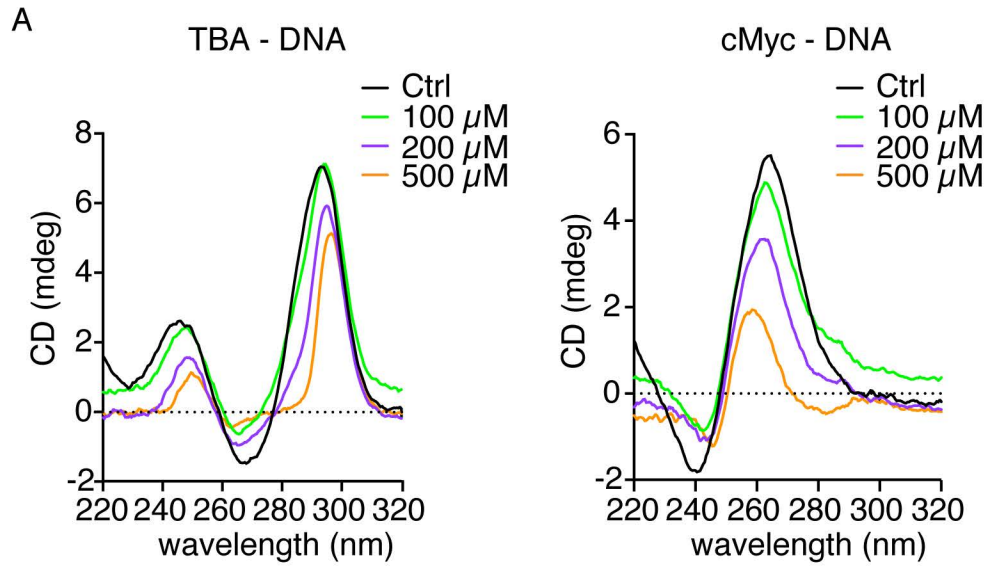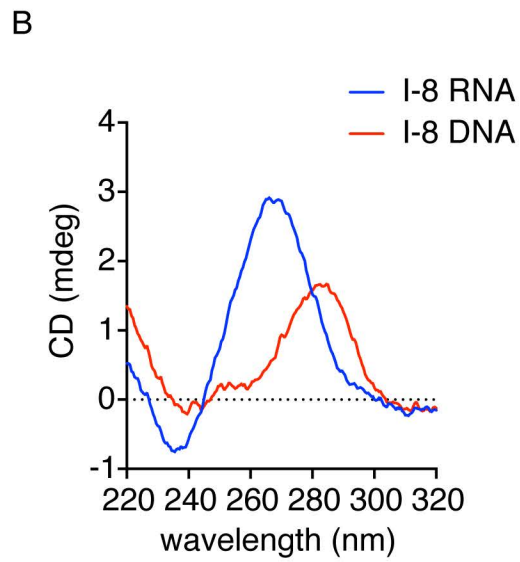

## SUPPLEMENTARY FIGURE LEGENDS

### **Supplementary Figure S1. Diagram of the minigene splicing reporters and the structure of emetine.**

(A) Diagram of the minigene splicing reporters that contain the CRQ and its mutated sequences in the intron downstream of the variable exon. The size of introns flanking the variable exon and the cloning sites to insert the CRQ sequences are shown. (B) Fluorescent images of HEK 293FT cells transfected with CRQ and CRQ-G4m constructs. (C) Chemical structure of emetine. (D) Fluorescence images of HEK 293A CRQ cells after 48 hours of emetine (20  $\mu$ M) treatment.

### **Supplementary Figure S2. The effect of emetine on the alternative splicing of I-8 and its mutant minigene constructs.**

(A) Diagram of the minigene splicing reporters where I-8 and its mutated sequences are inserted in the intron downstream of the variable exon. (B) Fluorescent images of HEK 293FT cells transfected with I-8 or its mutant reporters with or without the presence of emetine. Emetine promotes exon skipping to produce dsRed only with the I-8 minigene reporter but not with the control or mutated minigenes. (C, D) Semi-quantitative PCR (C) and q-PCR (D) of cells transfected with I-8 minigene showing significant increase in exon skipping in the presence of emetine. Error bars represent S.E.M. \*,  $p < 0.05$ , \*\*,  $p < 0.01$ ; Student's *t*-test.

### **Supplementary Figure S3. The formation of G-quadruplexes.**

(A) Diagram of the minigene splicing reporters where different G-quadruplex sequences are inserted (Top). Sequences and proposed G-quadruplex secondary structures of G2U1, G3U1, NRQ are shown in the bottom panel. (B) RNA pulldown followed by western blot analysis showing that the addition of emetine disrupts the interaction between hnRNP and CRQ.

**Supplementary Figure S4. Inhibition of transcriptional elongation or translation exhibits no significant changes on G-quadruplex-dependent alternative splicing.** (A) Semi-quantitative RT-PCR of HEK 293FT cells showing that transcriptional inhibitors CPT and DRB have no significant effects on the alternative splicing of CRQ and its mutant minigenes. (B) qRT-PCR (Left panel) and semi-quantitative RT-PCR (Right panel) of HEK 293A CRQ cells showing no detectable effects on CRQ alternative splicing upon the treatment of the translation inhibitor CHX.

**Supplementary Figure S5. Emetine regulates alternative splicing of Bcl-x and promotes an EMT cell state.** (A) Genome browser tracks of RNA sequencing data showing emetine treatment promotes the usage of the Bcl-x exon 2 proximal 5' splice site, resulting in production of the short isoform Bcl-xS. The location of previously reported two G-quadruplexes are shown in yellow boxes. (B) Semi-quantitative RT-PCR validation of emetine's effect on endogenous Bcl-x exon 2 alternative 5'-splice site usage are shown. (C) qRT-PCR of HMLE cells showing that emetine treatment resulted in a decrease in expression of epithelial markers E-cadherin and  $\gamma$ -catenin, and a decrease in the ratio between CD44v and CD44s. (D) qPR-PCR of MCF7 cells showing consistent results in response to emetine. Error bars represent S.E.M. \*,  $p < 0.05$ , \*\*,  $p < 0.01$ , \*\*\*\*  $p < 0.0001$ ; Student's *t*-test.

**Supplementary Figure S6. The effect of emetine on DNA and RNA oligonucleotides.** (A) CD spectra analysis of DNA oligonucleotides TBA (Left panel) and cMyc (Right panel) in the presence of different concentrations of emetine. (B) CD spectra analysis of I-8 RNA and I-8 DNA oligonucleotides in the presence of 100 mM  $K^+$ . The I-8 DNA forms a positive peak at 284.5 nm,



but not at 290 nm - 295 nm, indicating that I-8 DNA does not form antiparallel DNA G-quadruplex structure.

## Supplementary Table S1 primers for plasmid construction

| primer                     | Sequence                          | comment                   |             |
|----------------------------|-----------------------------------|---------------------------|-------------|
| RG6EX_Ran 15nt for         | 5'-AATTCGACTACCAGAGAAGAC-3'       | Control for 15 nt inserts |             |
| RG6EX_Ran 15nt rev         | 5'-TCGAGTCTTCTCTGGTAGTCG-3'       |                           |             |
| RG6EX_Ran 21nt for         | 5'-AATTCGACTTCATCGTTCCGTCAAGGC-3' | Control for 21 nt inserts |             |
| RG6EX_Ran 21nt rev         | 5'-TCGAGCCTTGACGGAACGATGAAGTCG-3' |                           |             |
| RG6EX_I-8 15 nt_F          | 5'-AATTCTGGTGGTGGGAATGGTC-3'      | I-8 15 nt and mutations   |             |
| RG6EX_I-8 15 nt_R          | 5'-TCGAGACCATTCCACCACCAG-3'       |                           |             |
| RG6EX_I-8 G2m (15nt)_F     | 5'-AATTCTGGTGGTGGAGTGATC-3'       |                           |             |
| RG6EX_I-8 G2m (15nt)_R     | 5'-TCGAGATCACTCCACCACCAG-3'       |                           |             |
| RG6EX_I-8 15nt G4m_F       | 5'-AATTCTGATGATGAAATGATC-3'       |                           |             |
| RG6EX_I-8 15nt G4m_R       | 5'-TCGAGATCATTTTCATCATCAG-3'      |                           |             |
| G2U1-F                     | 5'-AATTCGGTGGTGGTGGC-3'           |                           | G2U1        |
| G2U1-R                     | 5'-TCGAGCCACCACCACCG-3'           |                           |             |
| G3U1-F                     | 5'-AATTCGGGTGGGTGGGTGGGC-3'       |                           | G3U1        |
| G3U1-R                     | 5'-TCGAGCCCACCCACCCACCCG-3'       |                           |             |
| NRQ-F                      | 5'-AATTCGGGAGGGGCGGGTCTGGGC-3'    | NRQ                       |             |
| NRQ-R                      | 5'-TCGAGCCCAGACCCGCCCTCCCG-3'     |                           |             |
| CRQ-F                      | 5'-AATTCGGGCGGCGGGCGGGCTGGGGC-3'  | CRQ and mutations         |             |
| CRQ-R                      | 5'-TCGAGCCCCAGCCCGCCCGCCCG-3'     |                           |             |
| CRQ G4m2-EcoR1-F1          | 5'-AATTCGGGCGGCGAGCGAGCTGGGGC-3'  |                           |             |
| CRQ G4m2-Xho1-R1           | 5'-TCGAGCCCCAGCTCGCTCGCCGCCCG-3'  |                           |             |
| CRQ-G4m-EcoR1-F1           | 5'-AATTCGAGCGCCGAGCGCGCTGAGGC-3'  |                           |             |
| CRQ-G4m-Xho1-R1            | 5'-TCGAGCCTCAGCGCGCTCGGCGCTCG-3'  |                           |             |
| Semi Primer F              | 5'-CAAAGTGGAGGACCCAGTACC-3'       |                           | Semi-RT PCR |
| Semi Primer R              | 5'-GCGCATGAACTCCTTGATGAC-3'       |                           |             |
| qRT-PCR Primer F inclusion | 5'-GATTACAAGGATGACGATGACAAG-3'    | qRT-PCR                   |             |
| qRT-PCR Primer R inclusion | 5'-CCTGATCCTCCTGACCTCAAT-3'       |                           |             |
| qRT-PCR Primer R skipping  | 5'-CCTGATCCTCCTGACCTCTAG-3'       |                           |             |

Supplementary Table S2: A high-throughput screen identifying 38 hits that increased percentage of red-colored cells

| Compound Name                         | Total Number of Cells | Percentage of red cells (%) | Formula                  | MolWt   |
|---------------------------------------|-----------------------|-----------------------------|--------------------------|---------|
| HOMIDIUM BROMIDE                      | 635                   | 93.858269                   | C21H20BrN3               | 394.32  |
| DAUNORUBICIN                          | 867                   | 89.042679                   | C27H29NO10               | 527.53  |
| RUTILANTINONE                         | 985                   | 84.060913                   | C22H20O9                 | 428.40  |
| EPIRUBICIN HYDROCHLORIDE              | 716                   | 80.586594                   | C27H30ClNO11             | 579.99  |
| SANGUINARINE SULFATE                  | 678                   | 75.663719                   | C20H15NO8S               | 429.41  |
| DALBERGIONE                           | 702                   | 69.943024                   | C15H12O2                 | 224.26  |
| DALBERGIONE, 4-METHOXY-4'-HYDROXY-    | 943                   | 53.340405                   | C16H14O4                 | 270.29  |
| 1,4-NAPHTHOQUINONE                    | 1276                  | 42.554859                   | C10H6O2                  | 158.16  |
| ANDROGRAPHOLIDE                       | 682                   | 32.111439                   | C20 H30 O5               | 350.452 |
| FLUBENDAZOLE                          | 607                   | 28.336079                   | C17 H13 F N2 O3          | 312.299 |
| PIROCTONE OLAMINE                     | 756                   | 26.455027                   | C14 H23 N O2 . C2 H7 N O | 298.424 |
| DORAMECTIN                            | 816                   | 22.058823                   | C50 H74 O14              | 899.121 |
| CHICAGO SKY BLUE                      | 4216                  | 19.568312                   | C34 H24 N6 O16 S4 . 4 Na | 992.814 |
| DOCETAXEL                             | 735                   | 17.959183                   | C43 H53 N O14 . 3 H2 O   | 861.929 |
| MECHLORETHAMINE                       | 643                   | 16.951788                   | C5H11Cl2N                | 156.06  |
| PIPLARTINE                            | 614                   | 16.775244                   | C17H19NO5                | 317.34  |
| OBTUSAQUINONE                         | 680                   | 16.029411                   | C16H14O3                 | 254.29  |
| EMETINE                               | 810                   | 15.951807                   | C29H42Cl2N2O4            | 553.58  |
| STROPHANTHIDINIC ACID LACTONE ACETATE | 621                   | 12.077294                   | C25H32O7                 | 444.53  |
| EVANS BLUE                            | 3889                  | 11.339676                   | C34H24N6Na4O14S4         | 960.82  |
| BISANHYDRORUTILANTINONE               | 4450                  | 10.516854                   | C22H16O7                 | 392.37  |
| 6-METHOXYHARMALAN                     | 718                   | 10.16713                    | C13 H14 N2 O             | 214.267 |
| CADMIUM ACETATE                       | 664                   | 9.939759                    | C4 H6 Cd O4              | 230.497 |
| NIFUROXAZIDE                          | 1127                  | 9.760426                    | C12 H9 N3 O5             | 275.219 |
| MYCOPHENOLIC ACID                     | 1174                  | 9.625213                    | C17H20O6                 | 320.35  |
| DIGOXIN                               | 915                   | 8.74317                     | C41H64O14                | 780.96  |
| COLCHICEINE                           | 1276                  | 8.699059                    | C21 H23 N O6             | 385.414 |
| TRIHYDROXYBENZALDEHYDE                | 1098                  | 8.652095                    | C7 H6 O4                 | 154.12  |
| FLUVASTATIN                           | 1903                  | 8.407777                    | C24 H26 F N O4           | 411.47  |
| MEPARTRICIN                           | 4197                  | 8.386943                    | C60H88N2O19              | 1141.37 |
| PITAVASTATIN CALCIUM                  | 1926                  | 8.359294                    | C25 H23 F N O4 . Ca      | 460.536 |
| DIGOXIGENIN                           | 656                   | 8.231708                    | C23H34O5                 | 390.52  |
| PARTHENOLIDE                          | 638                   | 8.15047                     | C15H20O3                 | 248.32  |
| 3-DESMETHYL-5-DESHYDROXYSCLEROIN      | 1378                  | 7.764877                    | C14 H12 O4               | 244.245 |
| POMIFERIN                             | 1298                  | 7.318952                    | C25H24O6                 | 420.47  |
| PATULIN                               | 676                   | 7.248521                    | C7H6O4                   | 154.12  |
| GAMBOGIC ACID                         | 811                   | 7.151665                    | C38H44O8                 | 628.77  |
| ACETYL ISOGAMBOGIC ACID               | 738                   | 7.046071                    | C40H46O9                 | 670.81  |

Supplementary Table S3: Dose reponse assay

| Compound Name        | Dose of Compound ( $\mu\text{M}$ ) | Percentage of red cells (%) |
|----------------------|------------------------------------|-----------------------------|
| EMETINE              | 20                                 | 42.04355                    |
|                      | 10                                 | 19.04033                    |
|                      | 5                                  | 9.421266                    |
|                      | 2.5                                | 7.843137                    |
|                      | 1                                  | 0.823924                    |
|                      | 0.5                                | 0.337675                    |
| MECHLORETHAMINE      | 20                                 | 31.929825                   |
|                      | 10                                 | 13.743218                   |
|                      | 5                                  | 7.5                         |
|                      | 2.5                                | 3.464419                    |
|                      | 1                                  | 0.725875                    |
|                      | 0.5                                | 0.925069                    |
| 1,4-NAPHTHOQUINONE   | 20                                 | 85.863266                   |
|                      | 10                                 | 69.632492                   |
|                      | 5                                  | 0.388749                    |
|                      | 2.5                                | 0.376857                    |
|                      | 1                                  | 0.680426                    |
|                      | 0.5                                | 0.45106                     |
| OBTUSAQUINONE        | 20                                 | 40.463917                   |
|                      | 10                                 | 37.727272                   |
|                      | 5                                  | 8.5                         |
|                      | 2.5                                | 2.734618                    |
|                      | 1                                  | 0.521119                    |
|                      | 0.5                                | 0.577399                    |
| PARTHENOLIDE         | 20                                 | 27.855711                   |
|                      | 10                                 | 17.827297                   |
|                      | 5                                  | 0.393701                    |
|                      | 2.5                                | 0.588865                    |
|                      | 1                                  | 0.371103                    |
|                      | 0.5                                | 0.425758                    |
| SANGUINARINE SULFATE | 20                                 | 72.256096                   |
|                      | 10                                 | 79.487183                   |
|                      | 5                                  | 68.253967                   |
|                      | 2.5                                | 44.699139                   |
|                      | 1                                  | 1.194624                    |
|                      | 0.5                                | 0.409165                    |

The full sequence of the CRQ minigene:

Capital letters denote exon sequences. The variable exon is colored in cyne. The CRQ sequence is marked in orange flanked by restriction enzyme sites colored in yellow. The sequences encoding the dsRED and EGFP proteins are marked in red and green, respectively. The splice sites are bolded.

gacggatcgggagatctcccgatcccctatggctgactctcagtacaatctgctctgatgccgcatagttaagccagtatctg  
ctccctgctgtgtgtggaggctgctgagtagtgcgagcaaaatthaagctacaacaaggcaaggctgaccgacaat  
tgcataagaatctgcttagggtaggcgttttgcgctgcttcgcatgtacgggcccagatatacgcgttgacattgattga  
ctagttattaatagtaatcaattacggggtcattagttcatagcccatatatggagttccgcggttacataacttacggtaaattg  
cccgcctggctgaccgccaacgacccccgccattgacgtcaataatgacgtatgttcccatagtaacgccaatagggga  
ctttccattgacgtcaatgggtggactattacggtaaaactgccactggcagtacatcaagtgtatcatatgccaagtacgc  
cccctattgacgtcaatgacggtaaattggccgcctggcattatgccagtacatgacctatgggactttcctacttggcagt  
acatctacgtattagtcacgtattaccatgggtgatgcggtttggcagtacatcaatgggctggatagcggtttgactcac  
ggggattccaagtctccaccccattgacgtcaatgggagttgtttggcaccaaaatcaacgggactttccaaaatgtcgt  
aacaactccgcccattgacgcaaattggcggttaggcgtgtacggtgggaggtctatataagcagagctctctggctaac  
TAGAGAACCCACTGCTTACTGGCTTATCGAAATTAATACGACTCACTATAGGGAGA  
CCCAAGCTGGCTAGCGTTTAACTTAAGCTTCCATGGATTACAAGGATGACGATGA  
CAAGGGGGTACCTGCCCAAAAAAAAAAACGCAAAGTGGAGGACCCAGTACCCGGA  
TCTAGAG**g**taggtgatcctctgctgctttggttcagggtttgccttgagggggggggggtggtgatttcttggcatgggca  
gactgagcagaaaaggccattgggaccatgtctgaatgcctccacctcaaccaccggccggttaggaccaaaagccacc  
ccgtgtttctcaggatctctttcccaggagatccctcgcccaagagggagatggcaatgctggatgtgtgcacaata  
attcaacaggcattggaacttcagcatcgtatgctgaatgcaattaacaatgctcaagcagaacccccggctccatcagca  
cagtgacaggaccaaacccatgctgcagcagtggggctgtctgtacgggggtgggcaatgggaaccggggctgtctggg  
gctctgctgctcagtgctgcatgacccacacatctgagagctgaaagggctggcgtctcactggtgacaccgt  
agcggccgccccacagcttaaggcacctggctaacctctgcgcttctccttccctcctcctggtcag**GATCCAG**  
**GCGATATCCGGAAGAATTGAG**gtagttactgcacitttctgaattcgggcgggcgggcgggctggggctcga  
ggggggcacagctggggagggacaagggacaaaaccaggagggggctccgagtccttggatttattccccctcatcc  
atgccttacctcaggaagggcctgaacagagccccttactcctgcttcttctcccatagctccctctccttgggtctctg  
actcagtgccacggttgtcccattctggggctgttagggagccagcaggagctgcccgtcctactgacctgtccttatt  
gcacag**G**TCAGGAGGATCAGGAGGACGAGGAGGAAGAGGAGACCGGTGTGAGCAA  
GGGCGAGGAGGACAACATGGCCATCATCAAGGAGTTCATGCGCTTCAAGGTGCAC  
ATGGAGGGCTCCGTGAACGGCCACGAGTTCGAGATCGAGGGCGAGGGCGAGGG  
CCGCCCTACGAGGGCACCCAGACCGCCAAGCTGAAGGTGACCAAGGGTGGCCO  
CCTGCCCTTCGCTGGGACATCCTGTCCCCTCAGTTCATGTACGGCTCCAAGGCC  
TACGTGAAGCACCCCGCCGACATCCCCGACTACTTGAAGCTGTCCTTCCCCGAGG  
GCTTCAAGTGGGAGCGCGTGATGAACTTCGAGGACGGCGGCGTGGTGACCGTGA  
CCCAGGACTCCTCCCTGCAGGACGGCGAGTTCATCTACAAGGTGAAGCTGCGCG  
GCACCAACTTCCCCTCCGACGGCCCCGTAATGCAGAAGAAGACCATGGGCTGGG  
AGGCCTCCTCCGAGCGGATGTACCCCGAGGACGGCGCCCTGAAGGGCGAGATCA  
AGCAGAGGCTGAAGCTGAAGGACGGCGGCCACTACGACGCAGAGGTCAAGACCA  
CCTACAAGGCCAAGAAGCCCGTGACGCTGCCCGGCGCCTACAACGTCAACATCAA  
GTTGGACATCACCTCCCACAACGAGGACTACACCATCGTGGAACAGTACGAACGC  
GCCGAGGGCCGCACTCCACCGGCGGCATGGACGAGCTGTACAAGTAA**ACCGCG**  
GT**GTGAGCAAGGGCGAGGAGCTGTTACCGGGGTGGTGCCCATCCTGGTCGAGC**

TGGACGGCGACGTAACGGCCACAAGTTCAGCGTGTCCGGCGAGGGCGAGGGC  
GATGCCACCTACGGCAAGCTGACCCTGAAGTTCATCTGCACCACCGGCAAGCTGC  
CCGTGCCCTGGCCCACCCTCGTGACCACCCTGACCTACGGCGTGCAGTGCTTCAG  
CCGCTACCCCGACCACATGAAGCAGCAGACTTCTTCAAGTCCGCCATGCCCGAA  
GGCTACGTCCAGGAGCGCACCATCTTCTTCAAGGACGACGGCAACTACAAGACCC  
GCGCCGAGGTGAAGTTCGAGGGCGACACCCTGGTGAACCGCATCGAGCTGAAGG  
GCATCGACTTCAAGGAGGACGGCAACATCCTGGGGCACAAGCTGGAGTACAATA  
CAACAGCCACAACGTCTATATCATGGCCGACAAGCAGAAGAACGGCATCAAGGTG  
AACTTCAAGATCCGCCACAACATCGAGGACGGCAGCGTGCAGCTCGCCGACCACT  
ACCAGCAGAACACCCCATCGGCGACGGCCCCGTGCTGCTGCCCGACAACCACT  
ACCTGAGCACCCAGTCCGCCCTGAGCAAAGACCCCAACGAGAAGCGCGATCACAT  
GGTCCTGCTGGAGTTCGTGACCGCCGCCGGGATCACTCTCGGCATGGACGAGCT  
GTACAAGTAAgggcccgtttaaccgctgatcagcctcgactgtgccttctagttgccagccatctgtgtttgccct  
ccccgctgccttcttgaccctggaaggtgccactcccactgtcctttcctaataaaatgaggaaatgcatcgattgtctga  
gtaggtgcattctattctgggggtgggggtggggcaggacagcaagggggaggattgggaagacaatagcaggcatg  
ctgggatgcggtgggctctatggctctgaggcggaaagaaccagctggggctctagggggtatccccacgcgccctgt  
agcggcgcattaagcgcggcgggtgtggtggttacgcgcagcgtgaccgctacacttgccagcgccttagcggccgctc  
ctttcgcttcttcccttcttctcgcaccgttcgcccgtttcccgtcaagctctaatacggggcatcccttagggttccgatt  
agtgccttacggcacctcgaccccaaaaaacttgattaggggtgatggttcacgtagtgggcatcgccctgatagacggttt  
tcgccccttgacgttgagtcacgcttcttaatagtgactctgttccaaactggaacaacactcaaccctatctcggcttatt  
ctttgattataagggttttggggatttcggcctattggttaaaaaatgagctgatttaaaaaatlaacggaattaattct  
gtggaatgtgtgtcagttagggtgtggaagtccccaggctccccaggcaggcagaagtatgcaaagcatgcatctcaat  
tagtcagcaaccaggtgtggaagtccccaggctccccaggcaggcagaagtatgcaaagcatgcatctcaattagtcag  
caaccatagtcgccccttaactccgcccatactccgcccagttccgcccattctccgcccatactggtgac  
taatTTTTTattatgcagaggccgaggccgctctgcctctgagctattcagaagtagtgaggaggctTTTTggaggccta  
ggctttgcaaaaagctcccgggagctgtatatccatttccgatctgatcaagagacaggataggatcgtttcgcatgatt  
gaacaagatggattgcacgcaggttctccgcccgttgggtggagaggctattcggctatgactgggcacaacagacaa  
tcggctgctctgatgccgcccgttccggctgtcagcgcaggggccccggttctttgtcaagaccgacctgtccggtgcc  
ctgaatgaactgcaggacgaggcagcgcggctatcgtggctggccacgacggcggttcttgcgcagctgtgctcgacg  
ttgactgaagcgggaagggactggctgctattgggcgaagtccggggcaggatctctgtcatctcacctgtctctgc  
cgagaaagtatccatcatggctgatgcaatgcggcggctgcatacgttgatccggctacctgcccattcgaccaccaag  
cgaaacatcgcatcgagcagcagcactcggatggaagccggtctgtcgatcaggatgatctggacgaagagcatca  
ggggctcgcgccagccgaactgtccaggctcaaggcgcgcagtcgacggcgaggatctcgtcgtgacctatgg  
cgatgcctgcttgccgaatatcatggtggaataaggccgttttctggattcatcactgtggccggctgggtgtgcccggacc  
gctatcaggacatagcgttggctaccgctgatattgctgaagagctggcggcgaatgggctgaccgcttctcgtgctttac  
ggtatcgccgctcccgattcgcagcgcacgccttctatgccttctgacgagttctctgagcgggactctggggttcgaaa  
tgaccgaccaagcgcgcccacctgccatcacgagatttcgattccaccgccccttctatgaaaggttgggcttcgga  
atcgtttccgggacgcccggctggatgatcctccagcgcggggtatctatgctggagttctcgcccaccccaactgtttatt  
gcagcttataatggttacaataaagcaatagcatcacaatttcacaataaagcatttttactgcattctagttgtggtt  
gtccaaactcatcaatgtatcttatcatgtctgtataccgtcgaccttagctagagcttggcgtaatcatggtcatagctttc  
ctgtgtgaaattgtatccgctcacaattccacacaacatacagaccggaagcataaagttaaagcctgggggtgctaat  
gagtgagctaactcacattaattgcgttgcgctcactgcccgtttccagtcgggaaacctgtcgtgccagctgcattaatga  
atcggccaaacgcgcccgggagaggcggttgcgtattgggcgctctccgcttctcgtcactgactcgtcgcgctcggctg  
ttcggctgcccgcgagcggatcagctcactcaaaggcggtaatacggttatccacagaatcaggggataacgcaggaa  
agaacatgtgagcaaaaaggccagcaaaaaggccaggaaccgtaaaaaggccgctgtggcggttttccataggctcc  
gccccctgacgagcatcacaataatcgacgctcaagtcagaggtggcgaaaccggacaggactataaagatacca

ggcgtttccccctggaagctccctcgtgcgctctcctgttccgaccctgccgcttaccggatacctgtccgcctttctccctcg  
ggaagcgtggcgctttctcaatgctcacgctgtaggatctcagttcgggtgtaggtcgttcgctccaagctgggctgtgtgcac  
gaacccccgttcagcccgaccgctgcgccttatccggtaactatcgtcttgagtccaacccggtaagacacgacttatcg  
ccactggcagcagccactggtaacaggattagcagagcgaggatgtagggcgggtctacagagttcttgaagtgggtggc  
ctaactcggctacactagaaggacagtatctggtatctgcgctctgctgaagccagttaccttcggaaaaagagttggtag  
ctcttgatccggcaaacaccaccgctggttagcgggtggtttttgttgcaagcagcagattacgcgcagaaaaaagg  
atctcaagaagatcctttgatctttctacgggtctgacgctcagtgaacgaaaactcacgtaagggttttgggtcatgag  
attatcaaaaaggatcttcacctagatccttttaataaaaaatgaagtttaaatcaatctaaagtataatgagtaaactggt  
ctgacagttaccaatgcttaatcagtgaggcacctatctcagcgatctgtctatttcggtcatccatagttgcctgactccccgtc  
gtgtagataactacgatacgggagggcctaccatctggccccagtgctgcaatgataccgcgagaccacgctcaccgg  
ctccagatttatcagcaataaaccagccagccggaagggccgagcgcagaagtggtcctgcaactttatccgcctccatc  
cagttatattgttggccggaagctagagtaagtagttcgccagttaatagttgcaacggttggccattgctacaggc  
atcgtggtgtcacgctcgtcgtttggtatggctcattcagctccggtcccaacgatcaaggcgagttacatgatccccatgt  
tgtcaaaaaagcgggttagctccttcggtcctccgatcgttgcagaagtaagttggccgcagtggtatcactcatggttatgg  
cagcactgcataattcttactgtcatgccatccgtaagatgcttttctgtgactggtgagtactcaaccaagtcattctgaga  
atagtgtatgcggcgaccgagttgctcttggccggcgtcaatacgggataataccgcgccacatagcagaactttaaagt  
gctcatcattggaaaacggtcttcggggcgaaaactctcaaggatcttaccgctgttgagatccagttcgatgtaaccactc  
gtgcacccaactgatcttcagcatctttactttaccagcgtttctgggtgagcaaaaacaggaaggcaaaatgccgcaa  
aaaaggaataagggcgacacggaaatgtgaatactcactcttcttttcaatattatgaagcatttatcagggttattg  
tctcatgagcggatacatatttgaatgtatttagaaaaataaacaataggggttccgcgcacatttccccgaaaagtcca  
cctgacgtc
